# Supplementary material
Source: publisher figshare collection journal article supplement (https://acs.figshare.com/ndownloader/files/4707151)
Supplement: Supplementary file 1 [file 4707151]

**“Resonance Raman Detection of the Hydroperoxo Intermediate in the Cytochrome P450 Enzymatic Cycle”**

Piotr J. Mak, Ilia G. Denisov, Doreen Victoria, Thomas M. Makris, Tianjing Deng, Stephen G. Sligar\* and James R. Kincaid\*

*Contribution from the Department of Chemistry, Marquette University, Milwaukee, Wisconsin 53233 and Department of Biochemistry, Center for Biophysics and Computational Biology, and the Beckman Institute, University of Illinois, Urbana-Champaign, Illinois 61801*

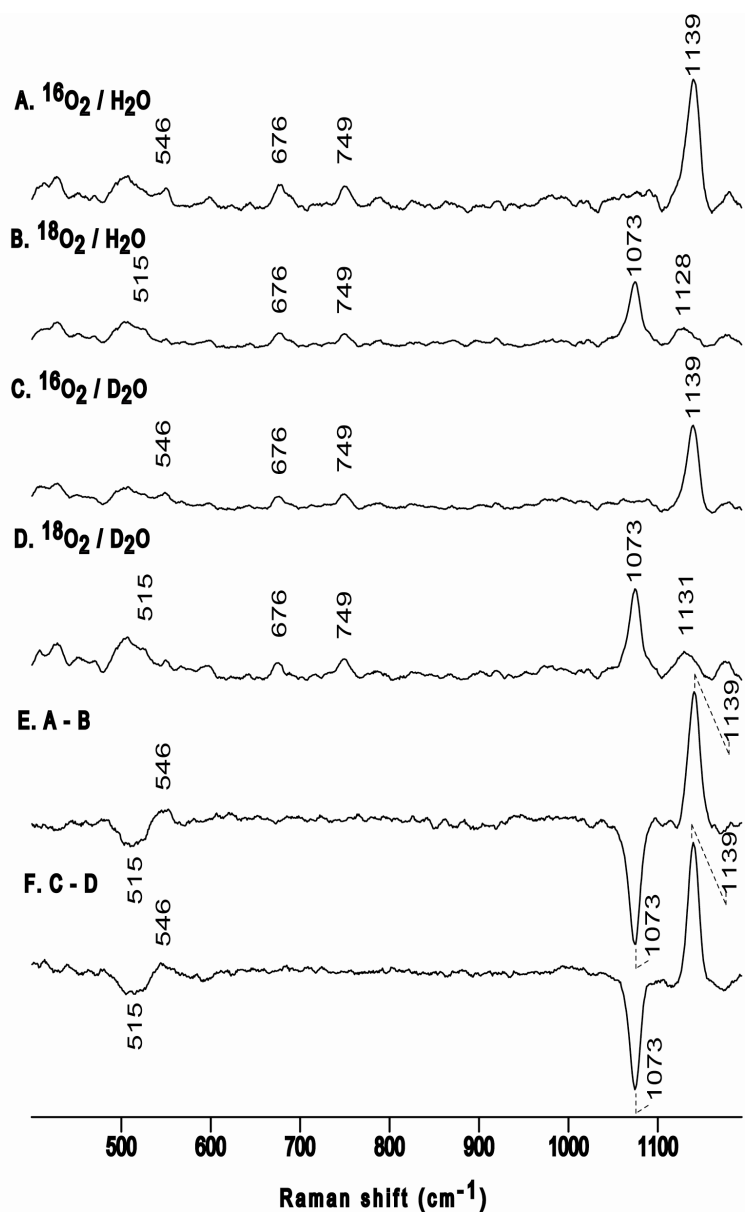

Figure S1: Resonance Raman spectra of  $^{16}\text{O}_2$  and  $^{18}\text{O}_2$  adducts of P450cam in  $\text{H}_2\text{O}$  and  $^2\text{H}_2\text{O}$  buffer, before irradiation (30 % glycerol, 413 nm excitation line, 77 K).

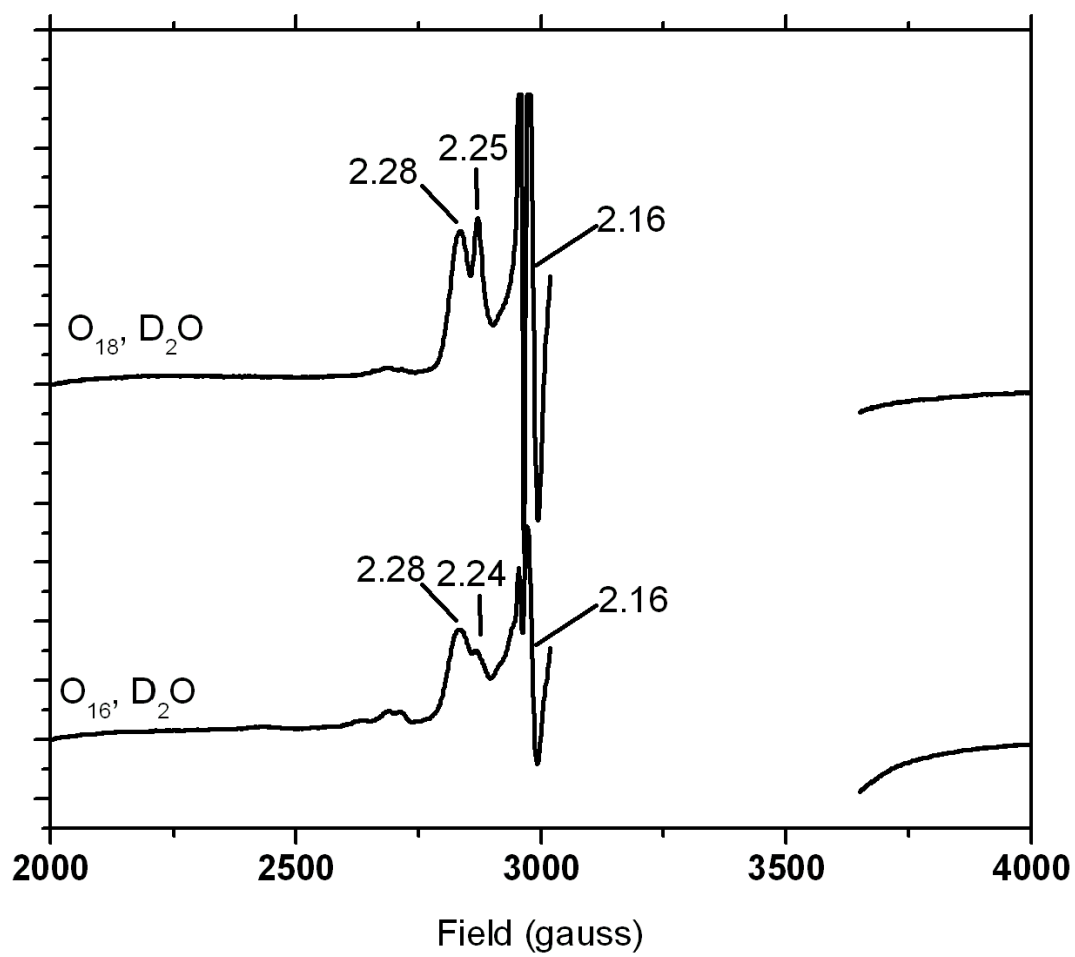

Figure S2: EPR spectra of irradiated oxyCYP101.

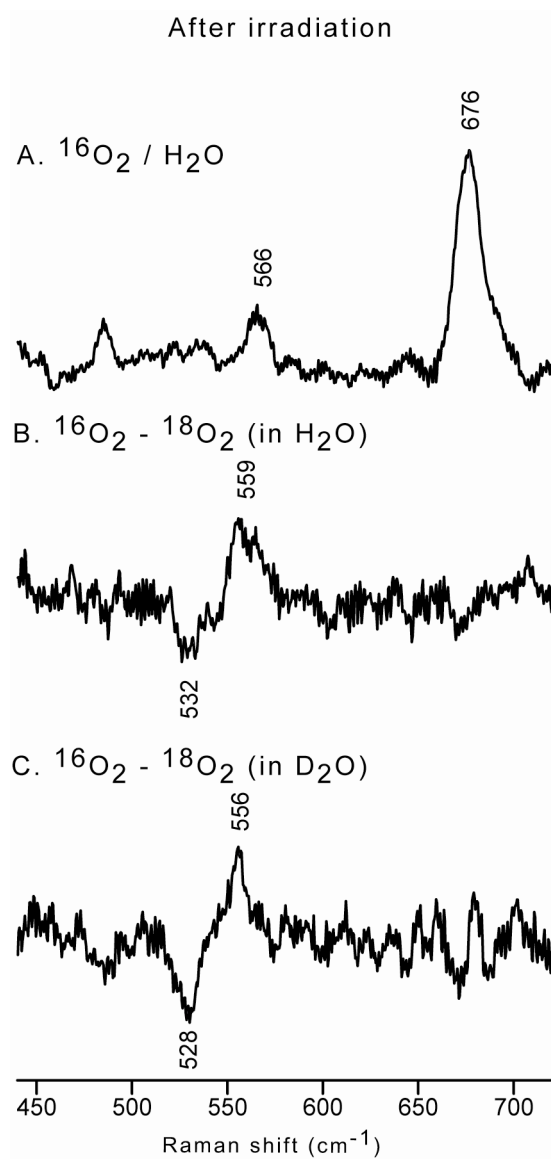

Figure S3: Low Frequency RR spectrum of  $^{16}\text{O}_2$  CYP101 in 30% glycerol/buffer after irradiation (A);  $^{16}\text{O}_2$ - $^{18}\text{O}_2$  in glycerol /buffer (B);  $^{16}\text{O}_2$ - $^{18}\text{O}_2$  in deuterated glycerol/buffer (C).
